# Supplementary material
Source: PubMed Central journal article supplement (PMC2268567)
Supplement: pnas_0712110105_2.pdf [file pnas_0712110105_2.pdf]

```

      110      120      130      140      150
      . . . . | . . . . | . . . . | . . . . | . . . . |
Dmel\P-element  A P A K G Q T F K R R R L N A D A V E
Dbif\P-element  A L K - G K I Y K K R R L N N D A V P
Dhel\P-element  T P N K G E T N K R R R L N K D A I P
Dwil\P-element  A P A K G Q T F K R R R L N A D A V P
Spal\P-element  T P N K G Q A N K R R R L N T D A I P
Hsap\THAP9      - - - - E S Y G I R R K L K K G A V P S V S L Y K - - - -
Dana\Galileo    - - - - G - - - K S R L R S N A V P T L N L F D N S L L C P N S P V P C E K F D F D I - - - -
Dpse\Galileo    - - - - G - - - V R K L K A N A V P T L N L S E N T L L T A F N A D L C N D Y E F S E - - - -
Dper\Galileo    - - - - G - - - V C K L K A N A V P T L N L S E N T L L T A F N A D L C N D Y E F S E - - - -
Dwil\Galileo    - - - - G - - - T K F L K A G A I P T L L L T D E P N L N L I A T D A K I D L Y D F - - - -
Dvir\Galileo    - - - - G - - - K T R F K K N A V L S L R L F A S L N L N F N I T R A R G R I D A F T F F K Q D D
Dmoj\GalileoC   - - - - G - - - K R Y L R A N A V P T L H L G N S N L I S N N N A D V S D D I Y S L D I Q E E A I
Dmoj\GalileoD   - - - - G - - - K R F L R V N A V P T L N L G N S N L L S N N N A D V S D D I Y S I D F Q E E N I
Dbuz\Galileo    - - - - G - - - K R K L K A N A V P T L N L C D P N F F S - N S A D F N D D F R L V D - - - -
Dmel\1360       - - - - G - - - V K Y L K K G A I P D R N L I N Y K S C N N A D I N L - - - -
Dsim\1360       - - - - G - - - V K Y L K K G T I P D R N L I K Y K S C N S A Y I N L - - - -
Dsec\1360       - - - - G - - - V K Y L K Q G T I P D R N L T K Y D S C Q N D D I N L - - - -
Dere\1360       - - - - G - - - V K Y L R K G T I P D R N L I K Y E S C K N D D I D F - - - -
Dyak\1360       - - - - G - - - V R Y L R K G T I P D R N L M T Y N - - N N D E I N F - - - -
Dper\1360       - - - - G - - - K K K L K S E A I P T L N L E I E - - L E N N S V E F - - - -
Dpse\1360       - - - - G - - - K K K L K S E A I P T L N L E I E - - L E N N S V E F - - - -
Dvir\1360       - - - - G - - - C R Y L K R G T I P D R N M D P G N N C T S N A N Y L - - - -

```

```

      160      170      180      190      200
      . . . . | . . . . | . . . . | . . . . | . . . . |
Dmel\P-element  - - - - - S K V I E P E P E K I K E G Y T - - - - -
Dbif\P-element  - - - - - Q R E K E D E S V K E G Y A - - - - -
Dhel\P-element  - - - - - T I E I E P E P E N V K E G Y A - - - - -
Dwil\P-element  - - - - - S K V I E P E P E K I K E G Y T - - - - -
Spal\P-element  - - - - - T K E K E P E P E H V K E G Y T - - - - -
Hsap\THAP9      - - - - - I P Q G V H L K G K A R - - - - -
Dana\Galileo    - - - - - N D E A E E P I G I Y V N P I R - T E Q F S N S L D S P S
Dpse\Galileo    - - - - - N K Q D N E P I G T F L Q A K R - I K L A D V H N I M S N
Dper\Galileo    - - - - - N K Q D N E P I G T F L Q A K R - I K L A D V H N I M S N
Dwil\Galileo    - - - - - C E E T H E E I S T F Q N I R K H G A E P T N I L E N I D
Dvir\Galileo    N I E T F S A F K N N N I T - - - - - I E T T R I D C E H V I E L S D - S G S L V K I S Q Y N N
Dmoj\GalileoC   T P Y S Y Q K K C L N K V V D D F M K P S D T E Q Q H Q S S N I Q T Q S D G E E N L E N F L S F D N
Dmoj\GalileoD   I P Y S Y T K K S L D K V V D G F V K P S D T E Q Q H P I S N I P N P S D E E D N L E N F L S F D N
Dbuz\Galileo    - - - - - N R G A E H Q N E N V P N E C D - D E L I E N L L I F D D
Dmel\1360       - - - - - N A V G S P P R K R H R S Q S P - - - - -
Dsim\1360       - - - - - N A V G S P P R K R H R S Q S P - - - - -
Dsec\1360       - - - - - N A V G S P P R K R H R S Q S P - - - - -
Dere\1360       - - - - - N A V R S P P Q K R C R S Q S P - - - - -
Dyak\1360       - - - - - N A V R S P A Q K R Y R S Q S P - - - - -
Dper\1360       - - - - - I E P E I D A E K E - - - - -
Dpse\1360       - - - - - I E P E I D A E K E - - - - -
Dvir\1360       - - - - - N V L I S P P R K R K R S Q S P - - - - -

```

```

                210                220                230                240                250
                . . . . | . . . . | . . . . | . . . . | . . . . | . . . . | . . . . | . . . . | . . . . |
Dmel\P-element -----SGSTQTE-----
Dbif\P-element -----NASTETEDTV-----
Dhel\P-element -----SSSTQTE-----
Dwil\P-element -----SGSTQTE-----
Spal\P-element -----SSSTQTECECVC-----
Hsap\THAP9 -----QKILKQPLPDNSQEVATED-----
Dana\Galileo NLETPCAPQLED-----SPFCSNCQKREENEMFYRN
Dpse\Galileo ELEQQCVTEAPDKVS-----LENKESIDIKFCENCLKREQNEKYRN
Dper\Galileo ELEQHCVTEEPDKVS-----LENKESINIKFCENCLKREQNEKYRN
Dwil\Galileo NNTEKVEDISDISTDC-----MQFCSNCLKKEQNEAYYRK
Dvir\Galileo PEKTKCHLSNHVGFPELYDNISLSAEKDSQDIRFCPNCLKKEQNELYYQN
Dmoj\GalileoC SLQNQLWQDLSAGR-----SSFCSNCLKREQNEVYYRK
Dmoj\GalileoD SLKNQLWQDLSAGR-----SSFCSNCLKREQNELYYRN
Dbuz\Galileo NSKKEFWQNLAVDR-----TPYCLNCIKREQNEVYYRK
Dmel\1360 -----VEVCRQCHKNAKTLKVFQK-----
Dsim\1360 -----VEVCRQCHKNAKTLKVLKN-----
Dsec\1360 -----VEVCRQCHKNAKTLKVFQK-----
Dere\1360 -----GEVCRQCHKNTKTLKMFKK-----
Dyak\1360 -----VEICRQCHKNTKTLKVFQK-----
Dper\1360 -----VSICEKCKKNSKSNFYKK-----
Dpse\1360 -----VSICEKCKKNSKSNFYKK-----
Dvir\1360 -----AEICRQCHKNTTTLKYYQK-----

```

```

                260                270                280                290                300
                . . . . ▲ . . . . ▲ . . . . ▲ | . . . . | . . . . | . . . . | . . . . | . . . . |
Dmel\P-element -SCSLFNENKSLREKIRTLEYEMRRLEQQLR-----ES
Dbif\P-element INHSTSM EIKTLRQKIRALEDEVQSLRKLVE-----DA
Dhel\P-element -CCSLSNENKSLRQMIRAMEYDLQRLRNQLE-----ES
Dwil\P-element -SCSLFNENKSLREKIRTLEYEMRRLEQQLR-----ES
Spal\P-element RCCSLSTENKSLTETIQAMEYDLQRLRNQLE-----ES
Hsap\THAP9 HNYSLKTPLTIGAEKLAEVQOMLQVSKKRLISVKNYR---MIKKRKGRLRL
Dana\Galileo KNYEMFLELKKYKEKMQKMGRALVLMKNASRRRGK----RNSRKTTPNL
Dpse\Galileo KYYEIMADQKKRENGFIKLKDRFLALKRVVYRRNRRYR--IKTTNLKPNI
Dper\Galileo KYYEIMADQKKRENGFKKLKDRFLALKMVVYRRNRRYR--IKTTNLKPNI
Dwil\Galileo KCFEMSENKKETIQVKVLCNKKIRHLRIVLRNERARKLK-YLKEKKKIDI
Dvir\Galileo KYWKFFLKCTREYKQVQHYKRKLHRMQILLRSERIKEASYFKKSRKNINI
Dmoj\GalileoC KYYEIMKVALQNVQKENYNLKKRYSFLRNAHRQRNIYQR--ARKEKKHVNI
Dmoj\GalileoD KYYDMGVDLKKSQQEFLKLKKKYLALKNASRHRNIYYR--IRKVKKHVNV
Dbuz\Galileo KYYEIGLDLKKVQERYTKLKRRFISFKRVSNYRGVSEFR--VRRAKKTVNV
Dmel\1360 KCIAFKKLSDERQIRIKMLRKENSNLKRKLV-----RLESKTEKNI
Dsim\1360 KYLSFFKMSDERQTLIKNLRKENSNLKRKLV-----RLESKSKKNI
Dsec\1360 KYFASKKLSDERQTLIKNLRKENSNLKRKLV-----RLESKSKKNI
Dere\1360 KYLAFKKLSDERQIRIKMLRRENSNLKRKVI-----RLESKSEKNL
Dyak\1360 KYISYKKMSDERQIRIKMLRKENSNLKRKII-----RLESKSEKNL
Dper\1360 KCNRLLA EIKKLLKKEKLSKKYIPKNKKYVVS-----QKI
Dpse\1360 KCNRLLA EIKKLLKKEKLSKKYIPKNKKYVVS-----QKI
Dvir\1360 QYFTFKKIAEARKIRINLLKRENTNLKRRIK-----RLKVNAYESL

```

|                | 310           | 320           | 330         | 340        | 350     |          |          |          |          |
|----------------|---------------|---------------|-------------|------------|---------|----------|----------|----------|----------|
| Dmel\P-element | QQLEESLRKIFTD | TQIRILKNGGQR  | ---         | ATFNSSDD   | -----   | ISTAICLH |          |          |          |
| Dbif\P-element | SQLEKSLSTIFT  | TQIKILKSGGKR  | ---         | SEFNSSDD   | -----   | ISWAMCLH |          |          |          |
| Dhel\P-element | RQLEESLGKFFTE | AQIKILKNGGKR  | ---         | STFTSSDD   | -----   | LSAAICLH |          |          |          |
| Dwil\P-element | QQLEESLRKIFTD | TQIRILKNGGQR  | ---         | ATFNSSDD   | -----   | ISTAICLH |          |          |          |
| Spal\P-element | RQLEESLAKIFTE | TQIKILKNGGKR  | ---         | STFTSSDD   | -----   | ISAAICLH |          |          |          |
| Hsap\THAP9     | IDALVEEKLLSE  | EETECLLRAQFSD | FKWELYNWRET | DEYSAEMKQF | ACTLY   |          |          |          |          |
| Dana\Galileo   | FNIINKLPHVSD  | EAKTLCKMLL    | KKS         | ---        | NSYNSAE | -----    | KVIAQNIN |          |          |
| Dpse\Galileo   | IPIIAKMTHVSA  | EAKTICIMIL    | KKT         | ---        | LSYSPA  | -----    | KVIAQNIN |          |          |
| Dper\Galileo   | IPIIAKMTHVSA  | EAKMICIMIL    | KKT         | ---        | LSYSPA  | -----    | KVIAKNIN |          |          |
| Dwil\Galileo   | QGLIDKKC      | -VSKNSNTV     | CKMLLKNK    | ---        | QSWEDEE | -----    | KIIAQSIN |          |          |
| Dvir\Galileo   | FAILDSKPF     | LSXNSNTV      | CKMLLKNK    | ---        | NSWEEEE | -----    | KVVAQSIH |          |          |
| Dmoj\GalileoC  | FTTINNLP      | PHVSDQSKV     | LCKMLFKK    | ---        | QVYNSAE | -----    | RVISQNMH |          |          |
| Dmoj\GalileoD  | FTTINNLP      | PHVSENSK      | VLCRMLLK    | ---        | HVYNSAE | -----    | RAIAQNIN |          |          |
| Dbuz\Galileo   | FTTINSLAHV    | SEQSKVL       | CKMLLKNT    | ---        | NFYNSAE | -----    | RVLSQNIN |          |          |
| Dmel\1360      | YSEIDKIN      | -LTGNEKIL     | TKMLLKEK    | KG         | TNTRW   | NDCE     | -----    | KLFAQSIY |          |
| Dsim\1360      | YSEIDKIN      | -LTGNEKIL     | AKMLIKEK    | KG         | TNTRW   | NDCE     | -----    | KLFAQSIY |          |
| Dsec\1360      | YSEIEKIN      | -LTGNEKIL     | AKMLIKEK    | KG         | TNTRW   | NDCE     | -----    | KLFAQSIY |          |
| Dere\1360      | LSQIDKIN      | -LTGNEKIL     | AKMLLKEK    | KG         | TNTRW   | NDSE     | -----    | KLFAQSIY |          |
| Dyak\1360      | LSQIDKIN      | -LTGNEKIL     | VKMLLKEK    | KG         | TNTRW   | NDSE     | -----    | KLFAQSIY |          |
| Dper\1360      | KDLIDNLE      | -ISKESKIF     | CKLFV       | GTRP       | ---     | QKYGEDV  | -----    | QFLAQNIY |          |
| Dpse\1360      | KDLIDNLE      | -ISKESKIF     | CKLFV       | GTRP       | ---     | QKYGEDV  | -----    | QFLAQNIY |          |
| Dvir\1360      | ISKVDKMD      | -LTGNEQIL     | IKMLLKEK    | KG         | TCLR    | W        | NDSE     | -----    | KLFAQGIF |

|                | 360         | 370       | 380      | 390      | 400           |        |        |                  |         |        |       |
|----------------|-------------|-----------|----------|----------|---------------|--------|--------|------------------|---------|--------|-------|
| Dmel\P-element | TAGPRAYNHLY | KK-GFPLP  | SRTTLYRW | LSDVDIKR | GCLDVVIDLMDS  | --D    |        |                  |         |        |       |
| Dbif\P-element | TAGPRAYNHLY | KK-GFPLP  | CRATLYK  | WLSNVEIQ | TGCLDVVIDLMDN | --M    |        |                  |         |        |       |
| Dhel\P-element | TAGPRAYNHLY | KK-GFPLP  | SRTTLYRW | LSDVEIKT | GCLDVAIDL     | MEN--D |        |                  |         |        |       |
| Dwil\P-element | TAGPRAYNHLY | KK-GFPLP  | SRTTLYRW | LSDVDIKR | GCLDVVIDLMDS  | --D    |        |                  |         |        |       |
| Spal\P-element | TAGPRAYTHLY | KK-GFPLP  | SRTTLYRW | LSDVEIKP | GCLDVAIDL     | MEN--D |        |                  |         |        |       |
| Hsap\THAP9     | LCSSKVYDY   | VRKI--LKL | PHSSIL   | RTWLSK   | QPSPGFNS      | NIFSF  | LQRRVE |                  |         |        |       |
| Dana\Galileo   | FYSSRTYEY   | LRDVLN    | LKLP     | PAKSTL   | SRWALF        | KNLTP  | GFHPDF | LENLQKIVG        |         |        |       |
| Dpse\Galileo   | FYSSRTYEY   | LRDVLN    | LKLP     | PSKRTL   | ARWAVL        | KNMRP  | VFNPD  | LLSNLKTIFD       |         |        |       |
| Dper\Galileo   | FYSSRTYEY   | LRDVLN    | LKLP     | PSKRTL   | ARWAVL        | KNMRP  | GFNPD  | LLSNLKTIFD       |         |        |       |
| Dwil\Galileo   | FYSSKAYNF   | M         | RDDLE    | NLPC     | NKSLQ         | RWAPV  | RNMV   | PGLNENLLKHLKGIFL |         |        |       |
| Dvir\Galileo   | FYFAKAYD    | FMRNDL    | HLNLP    | SKSSL    | ARWAP         | VKYL   | VSGL   | NECLSN           | TLLKIFS |        |       |
| Dmoj\GalileoC  | FYSARAYD    | YLRDVL    | NLRLP    | CKKQL    | NRWAIL        | KNLVP  | GFNP   | ELLENL           | KDIVG   |        |       |
| Dmoj\GalileoD  | FYSARTYD    | YLRDVL    | NLRLP    | CKKSL    | NRWAIL        | KNLVP  | GFNP   | D                | LLLENLQ | GIVE   |       |
| Dbuz\Galileo   | FYSARAYEY   | LRDVL     | HLKLP    | SKKSL    | NRWAI         | FKNLT  | PGSN   | PELLEN           | LQ      | GIVE   |       |
| Dmel\1360      | YRSTSTYT    | FLRDSL    | KLNF     | PS       | PSSLQ         | KWNSI  | KKLQ   | PGDNE            | CLYSAL  | KESIK  |       |
| Dsim\1360      | YRSTSTYT    | FLRDSL    | KLNF     | PS       | PSSLQ         | KWNSI  | KKLQ   | PGDNE            | CLYSAL  | KESIK  |       |
| Dsec\1360      | YRSTSTYT    | FLRDSL    | KLNF     | PS       | PSSLQ         | KWNSI  | KKLQ   | PGDNE            | CLYSAL  | KESIK  |       |
| Dere\1360      | YRSTSTYT    | FLRDSL    | KLNF     | PS       | PSSLQ         | KWNSI  | KKLQ   | PGDNE            | CLYSAL  | KETIK  |       |
| Dyak\1360      | YRSTSTYT    | FLRDSL    | KLNF     | PS       | PSSLQ         | KWNSI  | KKLQ   | PGDNE            | CLYSAL  | RETIK  |       |
| Dper\1360      | YVSPSTY     | AFMRN     | RNL      | LSL      | PHVSTL        | YRWD   | PIKSL  | QPGF             | ENTA    | IDA    | ----- |
| Dpse\1360      | YVSPSTY     | AFMRN     | RNL      | LSL      | PHVSTL        | YRWD   | PIKSL  | QPGF             | ENTA    | IDA    | ----- |
| Dvir\1360      | YRSTSTY     | KFLR      | DSLQ     | LNLP     | PS            | PSSLQ  | KWNSI  | KKLQ             | PGDNE   | CLYSAL | KDAIK |

|                |                                                                   |                                |                     |        |       |
|----------------|-------------------------------------------------------------------|--------------------------------|---------------------|--------|-------|
|                | 410                                                               | 420                            | 430                 | 440    | 450   |
|                | ..... ..... ..... ..... ..... ..... ..... ..... ..... ..... ..... |                                |                     |        |       |
| Dmel\P-element | GVDDADKLCVLA                                                      | FDEMKVAAAFEYDSSADIV            | -----               | YEPSDY | ----- |
| Dbif\P-element | DMDTADKLCVLA                                                      | FDEMKVAGTFEYDSSADLV            | -----               | YEPSEY | ----- |
| Dhel\P-element | AMDEADKLCVLA                                                      | FDEMKVAAAFEYDSSADVI            | -----               | YEPSNY | ----- |
| Dwil\P-element | GVDDADKLCVLA                                                      | FDEMKVAAAFEYDSSADIV            | -----               | YEPSDY | ----- |
| Spal\P-element | AIDEADKLCVLA                                                      | FDEMKVAAAFEYDSSADV             | -----               | YVPSNY | ----- |
| Hsap\THAP9     | NGDQLYQYCSLLIKSMPLKQQLQWDPSSHSLQGFMDFGLGKLDADETPLA                |                                |                     |        |       |
| Dana\Galileo   | EMSEKGEAVILCDEIKIKKGLQYNTALDEIQGFENDGEKRTRF                       | ----                           | LG                  |        |       |
| Dpse\Galileo   | GMSSKGEAVILFDEIKIKRGLHYNIALDEIQGYENDGQNTKSL                       | ----                           | LG                  |        |       |
| Dper\Galileo   | GMSSKGEAVILFDEIKIK                                                | -----                          | IALDEIQGYKNDGQNTKSL | ----   | LG    |
| Dwil\Galileo   | KMHNKSKNSVLVLEISIRKGLQYNSHRGEVEGFVDDGYEKTDA                       | ----                           | LC                  |        |       |
| Dvir\Galileo   | KMNEKSKQAVLLFDEMSIKRGLQYNSRRDEIEGFTDDGVEKTPE                      | ----                           | LC                  |        |       |
| Dmoj\GalileoC  | KMSAKEKYTVLVCEIKVKRGLQYNSSLDEIQGFENDGIKRTKF                       | ----                           | LG                  |        |       |
| Dmoj\GalileoD  | KMSAKEKYAVLVCELEKVKRGLQYNSSLDEIQGFENDGVKRSRF                      | ----                           | LG                  |        |       |
| Dbuz\Galileo   | KMSDKGKYAVLVFDEVKIKKGLQYNSYLDEIQGFENDGEKRTKF                      | ----                           | LG                  |        |       |
| Dmel\1360      | EMNASDKECILACDEVAIKKNLTYNVSVDIIDGIEHL-LDRSNK                      | ----                           | IG                  |        |       |
| Dsim\1360      | EMNASDKECILACDEVAIKKNLAYNVSVDIIDGIEHL-LDRSNK                      | ----                           | IG                  |        |       |
| Dsec\1360      | EMNASDKECILACDEVAIKKNLAYNVSVDIIDGIEHL-LDRSNK                      | ----                           | IG                  |        |       |
| Dere\1360      | EMNESEKECILTCEVAIKKNLTYNVSVDIIDGLEHL-IDRSNK                       | ----                           | MG                  |        |       |
| Dyak\1360      | EMNESDKECILTCEVAIKKNLTYNVSVDIIDGLEHL-IDRSNK                       | ----                           | MG                  |        |       |
| Dper\1360      | -----                                                             | EMAIRRELRYNEKLDIIDGFEHNGFERTSR | ----                | IA     |       |
| Dpse\1360      | -----                                                             | EMAIRRELRNNEKLDIIDGFEHNGFERTSR | ----                | IA     |       |
| Dvir\1360      | GMSECDKECILTCEVAIEKNLTYNTSVDAIDGLEHL-LERSNK                       | ----                           | MG                  |        |       |

|                |                                                                   |                                          |                      |      |     |
|----------------|-------------------------------------------------------------------|------------------------------------------|----------------------|------|-----|
|                | 460                                                               | 470                                      | 480                  | 490  | 500 |
|                | ..... ..... ..... ..... ..... ..... ..... ..... ..... ..... ..... |                                          |                      |      |     |
| Dmel\P-element | --VQLAIVRGLKKS                                                    | WKQPV-FFD                                | FNTRMDPDTLNNILRKLHRK | ---- | GYL |
| Dbif\P-element | --VQLAMVRGLKKS                                                    | WKQPV-FFD                                | YDTRMDVPTLYELIKKLHRR | ---- | GYF |
| Dhel\P-element | --VQLAIVRGLKKS                                                    | WKQPI-FFD                                | FSTRMDADTLNNIIRKLHTK | ---- | GYP |
| Dwil\P-element | --IQLAIVRGLKKS                                                    | WKQPV-FFD                                | FNTRMDPDTLNNILRKLHRK | ---- | GYL |
| Spal\P-element | --VQLAIVRGLKKS                                                    | WKQPI-FFD                                | FSTRMDADTLNNIIRKLHTK | ---- | GYP |
| Hsap\THAP9     | SETVLLMAVGI                                                       | FGHWRTPLGYF-FVNRASGYLQAQQLLRLTIGKLSDIGIT |                      |      |     |
| Dana\Galileo   | QQVCVFMARGLFENWKYVISYTVSANGIKHDALMKKVEANIEVSQTLGLN                |                                          |                      |      |     |
| Dpse\Galileo   | QQVCVFMIRGLFENWKYVLSYTVTANGIKHEALLTKVTANIEQAQVLGLN                |                                          |                      |      |     |
| Dper\Galileo   | QQVCVFMIRGLFENWKYVLSYTVTLNGIKHEALLAKVTANIERAQVLGLN                |                                          |                      |      |     |
| Dwil\Galileo   | KQICVFMVRGLYANWKVLSYVATSTGLSSHKLTLQIDSNIRAARTLGLF                 |                                          |                      |      |     |
| Dvir\Galileo   | KQISVFMVRGLYENWIFVLSYFATSTGLLTLKLRQIESFLRTGYSLGLN                 |                                          |                      |      |     |
| Dmoj\GalileoC  | QQVCVFLVRGLFDNWKYVLSYTVSARGINHTDLKKKFEENIGLSQALGLN                |                                          |                      |      |     |
| Dmoj\GalileoD  | QQVCVFLVRGLFENWKYVLSYTVSARGINHTDLKKKFEENIGLSQALGLN                |                                          |                      |      |     |
| Dbuz\Galileo   | QQVCVFLIRGLFENWKYVLSYTVSANGIRHSDLKSKVEANIGLSQALGLN                |                                          |                      |      |     |
| Dmel\1360      | SHICVFVLRGILKKWKFILNYFVAETNIKGDCLKSLIYKNIIEAETIGFK                |                                          |                      |      |     |
| Dsim\1360      | SHICVFVVRGILKKWKFIINYFVAETNIKGDCLKSLIYKNIIEAEKIGFK                |                                          |                      |      |     |
| Dsec\1360      | SHICVFVVRGILKKWKFIINYFVAETNIKGDCLKSLIYKNIIEAEKIGFK                |                                          |                      |      |     |
| Dere\1360      | SHICVFVIRGILKKWKFILNYFVPEETNIKGDCLKKFIYKNINIVENIGFK               |                                          |                      |      |     |
| Dyak\1360      | SHICVFVIRGILKKWKFILNYFVPEETNIKGDCLKKLIYKNINIAENIGFK               |                                          |                      |      |     |
| Dper\1360      | KPVCVFMFKSIFSKTSSLLNYFASENGLTSDDLCEIVKRNISILHSLGVS                |                                          |                      |      |     |
| Dpse\1360      | KPVCVFMFKSIFSKTSSLLNYFASENGLTSDDLCEIVKRNISILHSLGVS                |                                          |                      |      |     |
| Dvir\1360      | SHICVFVLRVIFKKWKFILNYFVPKTNIKGECLKALILRNINIAENIGFT                |                                          |                      |      |     |

|                | 510      | 520              | 530            | 540        | 550                          |
|----------------|----------|------------------|----------------|------------|------------------------------|
| Dmel\P-element | VVAIVSDL | LG               | TGNQKLWTE      | ELGISE     | -----SKTWF                   |
| Dbif\P-element | VVSIIVSD | MGAGN            | QRLWREL        | GISE       | -----EKTWF                   |
| Dhel\P-element | VVAIVSDL | GS               | GNQKLWSEL      | GVSE       | -----SKSWF                   |
| Dwil\P-element | VVAIVSDL | GTGNQKLWTE       | ELGISE         | -----SKTWS |                              |
| Spal\P-element | VVAIVSDL | GS               | GNQRLWSEL      | GVSE       | ECKFFTSIKIKNNLSLIFCNCFLAKIWF |
| Hsap\THAP9     | VLAVTSD  | ATAHSVQMAKALGIHI | -----DGDDMKCTF |            |                              |
| Dana\Galileo   | VRAAICD  | QGSNNRAAYKKW     | GVNI           | -----NKPSF |                              |
| Dpse\Galileo   | VRAAICD  | QGSNNRAVFRRL     | GVDI           | -----KNPSF |                              |
| Dper\Galileo   | VRAAICD  | QGSNNRAVFRRL     | GVDI           | -----KNPSF |                              |
| Dwil\Galileo   | IRAVVCD  | QGPNNRGAFNKL     | GIVN           | -----EAPYF |                              |
| Dvir\Galileo   | IKAIVCD  | QGSINRGAF        | TKYGVNK        | -----EVPYF |                              |
| Dmoj\GalileoC  | VKAVVCD  | QGSNNRAVFN       | RWGIDL         | -----NNHSF |                              |
| Dmoj\GalileoD  | VKAVVCD  | QGSNNRAVFN       | RWGIDF         | -----NNHSF |                              |
| Dbuz\Galileo   | VKAVVCD  | QGSNNRAV         | FRWGIDI        | -----NKPSF |                              |
| Dmel\1360      | VRGVVYD  | QGGNNRKCTS       | LLEVTN         | -----EKPYF |                              |
| Dsim\1360      | VRGVVYD  | QGGNNRKCTS       | LLEVTN         | -----EKPYF |                              |
| Dsec\1360      | VRGVVYD  | QGGNNRKCTS       | LLEVTN         | -----EKPYF |                              |
| Dere\1360      | VRGVVYD  | QGGNNRKCTS       | LLEVTN         | -----EKPYF |                              |
| Dyak\1360      | VRGVVYD  | QGGNNRKCTS       | LLEVTN         | -----EKPYF |                              |
| Dper\1360      | VCVLVXD  | QGSTNRKCF        | NNLGATI        | -----ENPFF |                              |
| Dpse\1360      | VKVLVXD  | QGSTNRKCF        | NNLGATI        | -----ENPFF |                              |
| Dvir\1360      | LRGVVYD  | QGGNNRKRTS       | LFKVTK         | -----EKPYF |                              |

|                | 560        | 570   | 580         | 590            | 600      |            |
|----------------|------------|-------|-------------|----------------|----------|------------|
| Dmel\P-element | SHPADDHLKI | FVFS  | DPHLIKLVRN  | HYVD-SGLTINGK  | KKLT     | KKTIQEALH  |
| Dbif\P-element | GHPEDEDLKI | FVFS  | DAPHLIKLVRN | HYLA-TGLHINGQ  | TLTKSTVE | QTIT       |
| Dhel\P-element | SHPTDEHLKI | SVFP  | DPHLIKLVRN  | HYVD-SGLTLYG   | KKLT     | TKTTVQQTLN |
| Dwil\P-element | SHPADDHLKI | FVFS  | DPHLIKLVRN  | HYVD-SGLTINGK  | KKLT     | KKTIQEALH  |
| Spal\P-element | SHPTDENSKI | FVFS  | DPHLIKLVRN  | HYVD-SGFTLNG   | KKLT     | TKTTVQQTLN |
| Hsap\THAP9     | QHPSSSSQQI | AYFF  | DSCHLLRLIR  | NAFQNFQSIQ     | FINGIAHW | QHLV       |
| Dana\Galileo   | NV---NDKEI | FVIF  | DAPHLIKSLRN | LLLK-NNLNTP    | DGEVSW   | DIKKLYQ    |
| Dpse\Galileo   | KV---QDKEI | FAIYN | VPHLIKSLRN  | IVRN-INLYTP    | DGVVSW   | KIVEEELYE  |
| Dper\Galileo   | KV---QDKEI | FAIYD | VPHLIKSLRN  | IVRN-RNLYTP    | DGVVSW   | KIVEEELYE  |
| Dwil\Galileo   | SL---DDQKI | YGIYD | VPHLTKSIR   | NILMR-DSIETP   | DGTVSW   | HVVVRLLE   |
| Dvir\Galileo   | TI---DDKKI | YGIYD | DPHLFKSLRN  | IILMR-NSLET    | PDVRSW   | QILVKLFQ   |
| Dmoj\GalileoC  | EV---NGEKI | FAIF  | DAPHLVKS    | LRNILLK-NNILAP | EGTVSW   | GIIRRLYE   |
| Dmoj\GalileoD  | EV---NGEKI | FAIF  | DAPHLVKS    | LRNILLK-KNISTP | EGTVSW   | GIIKRLYE   |
| Dbuz\Galileo   | HV---NDKEI | FAVFD | DAPHLVKS    | LRNILLR-HNISTT | QGTVSW   | XNIIRKLYE  |
| Dmel\1360      | TL---NNKK- | YMFYD | IPHLFKSV    | RNNFLR-ANFETP  | DGLVDF   | FDVIREVYE  |
| Dsim\1360      | TL---NNKKY | YMFYD | IPHLFKSI    | RNNFLK-ANFETP  | DGLVDF   | FDVIRDITK  |
| Dsec\1360      | TL---NNKKY | YMFYD | IPHLFKSI    | RNNFLK-ANFETP  | DGLVDF   | FDVIREVYE  |
| Dere\1360      | TF---NNKKY | YMFYD | IPHLFKSI    | RNNFLK-ANFETP  | DGLVDF   | FDVIREVYE  |
| Dyak\1360      | TL---NSKKY | YMFYD | IPHLFKSI    | RNNFLK-ANFETP  | DGRVDF   | FDVIREVYE  |
| Dper\1360      | EY---ENQKV | FCMYD | FPHLIKSLK   | NGLLT-CDLSSP   | DSIVSF   | FKVVOELWE  |
| Dpse\1360      | XY---ENQKV | FCMYD | FPHLIKSLK   | NGLLT-CDLSSP   | DSIVSF   | FKVVOELWE  |
| Dvir\1360      | YN---NNKRY | YLFYD | IPHLFKSI    | RNNLLK-AKFETP  | DGLVDF   | FDVIREVYE  |

```

          610          620          630          640          650
    . . . | . . . | . . . | . . . | . . . | . . . | . . . | . . . |
Dmel\P-element LCNKSDLS--ILFKINENHINVRSLAKQKVKLATQLESNNTTASSIRRCYS
Dbif\P-element HCKTDVT--ILFKVNEHSLNVRSLAKQKVKLATQLESNNTTASAIRRCYS
Dhel\P-element YCAKSDVS--ILFKISENHLNVRSLDKQKVNLATQLESNNTTASSIRRCYS
Dwil\P-element LCNKSDLS--ILFKINENHINVRSLAKQKVKLATQLESNNTTASSIRRCYS
Spal\P-element HCAKSDVS--ILYKISENHLNVRSLAKQKVKLATQLESNNTTASSIRRCYS
Hsap\THAP9     LEEQELSN--MERIPSTLANLKNH-VLKVNSATQLESESVASALEYLLS
Dana\Galileo   IESRNSTR--LCPKVTAKHINPNSFEKMKVKYATQIFSHTVAAAIRTVVD
Dpse\Galileo   IDSRNSTR--LCPKLTTKHIYPNSFEKMKVKYATQVFSHSVAAALRTMIS
Dper\Galileo   IDSRNSTR--LCPKLTTKHIYPNSFEKMKVKYATQVFSHSVAAALRTMIS
Dwil\Galileo   IDTSNTSTR-MCPQLTRKHIFQNSFEKMKVKYATQVFSQTVSSAIKTLIQ
Dvir\Galileo   IDTDITSTLFLCPKLSRKHIYPNYFKNMKVKYATQILSHAVASATKTLIQ
Dmoj\GalileoC  TETKNLTR--LCPKLTCLKHVSPNCFEKMVKKEATQIFSHSVAAAIRTVVE
Dmoj\GalileoD  TETKNLTR--LCPKLTCLKHVSPNCFEKMVKKLATQIFSHSVAAAIRTVVE
Dbuz\Galileo   IESKNLTR--LCPKLTCLKHVSPNCFEKMVKYATQVFSHSVAAAIRTVID
Dmel\1360      LDHGSVTR---MTKLTRSHVNPTRFELMRVCLATQTLSHTVAAAIKTCNQ
Dsim\1360      LDHGSVTR---MTKLTRSHVNPTRFELMRVCLATQTLSHTVAGAIKTCNQ
Dsec\1360      LDHGSVTR---MTKLTRSHVNPTRFELMRVCLATQTLSHTVAAAIKTSNQ
Dere\1360      LDQRSVTR---MTKLTRSHVNPTRFELMRVCLATQTLSHTVAAAIKTCNQ
Dyak\1360      LDQGSVTR---MTKLTRSHVNPTRFELMRVCLATQTLSHTVAAAIKACNQ
Dper\1360      MEEHAGTK--MCPKLSRHHIYPNSFEKMRVKEATQIFSRTVQAAIKTVCE
Dpse\1360      MEEHAGTK--MCPKLSRHHIYPNSFEKMRVREATQIFSRTVQAAITTVCE
Dvir\1360      LEOGSVTR---MTKLTKSHVNPTRFELMRVCLATQIFSHTVAAAIRTCNK

```

```

          660          670          680          690          700
    . . . | . . . | . . . | . . . | . . . | . . . | . . . | . . . |
Dmel\P-element LG---YDIENATEADFFKLMNDWFDIFNSKLSTSNCI ECSQPYGKQLD
Dbif\P-element LG---YQVENAVETSDFLKLLNDWFDVFN SKLSTSNCIETTQPYGKQLE
Dhel\P-element LG---YDVENACETSDFLKLLNDWFDLFN SKLSTANCIQSTQPYGKQLP
Dwil\P-element LG---YDIENATEADFFKLMNDWFDIFNSKLSTSNCI ECSQPYGKQLD
Spal\P-element LG---YDVENACETSDFLKLLNDWFDVFN SKLSTANCIQSTQPYGKQLE
Hsap\THAP9     LDL---PPFQNCIGTIHFLRLINLFDIFNSRN-----CYGKGLKGPLL P
Dana\Galileo   SGGFV-DCRNSAEATANFIENVNKLFDCLNSHV-----LYEKNPDRCALQ
Dpse\Galileo   SGGFL-KCKENAEATATFIEKMNRLFDCLNSHV-----LYDKNPFERSALQ
Dper\Galileo   SGGFL-KCKENAEATATFIEKINRLFDCLNNHV-----LYDKNPFERSALQ
Dwil\Galileo   HGKFI-DCEDVAIATSKFIEKVNRLFDCLNSSN-----IYDRNPNKSAIQ
Dvir\Galileo   NGNFA-DCRDIALSTAKFIERVNKLLDCLKSNV-----LKDKNLFESALQ
Dmoj\GalileoC  TGGFA-DCKDSAVATAIFIDKINLFDCLNSHV-----LFDSPYRCALR
Dmoj\GalileoD  TGGFA-DCKDSAVATAIFIDKINLFDCLNSHV-----LFDSPYRCALR
Dbuz\Galileo   SGGFS-DCKDSAVATAIFIEKINRLFDCLNSHV-----LFDSPYRCALT
Dmel\1360      NKQLHRNSSEVAASTAAFVQKNDYFDCLNSRV-----LTDKNPMKCALQ
Dsim\1360      NKQLHRNSSEVAASTAAFVQKVNDYFDCLNSRV-----LTDKNPMKCALQ
Dsec\1360      NKQLHRNSSEVAASTAAFVQKVNDYFDCLNSRV-----LTDKNPMKCALQ
Dere\1360      NKQFHRNSPEVAASTAAFVQKVNDYFDCLNSRV-----LTDKNPMKCALQ
Dyak\1360      NKQFNHRNSPEVAASTAAFVQKVNDYFDCLNSRV-----LTDKNPMKCALQ
Dper\1360      TVGFKNSTYQVALSTAEFINKIDQIFDCMNSGS-----LYADNVYRSAIQ
Dpse\1360      TVGFKNSTYQVSLSTAEFINKVDQIFDCMNSGS-----LYADNVYRSAIQ
Dvir\1360      NKQLQRSSSEVADATATFVEKVNDFYFDCLNSRV-----INDNPNMKCALQ

```

|                |                                                             |            |                |             |     |
|----------------|-------------------------------------------------------------|------------|----------------|-------------|-----|
|                | 710                                                         | 720        | 730            | 740         | 750 |
|                | ..... ..... ..... ..... ..... ..... ..... ..... ..... ..... |            |                |             |     |
| Dmel\P-element | IQ-NDILNRMSEI                                               | ---MRT---  | GILDKPKRLPFQKG | IIVNNASLDG  |     |
| Dbif\P-element | LQ-RDILKQMSHI                                               | ---MSN---  | RICGQTHRLPFQKG | ILINNASLDG  |     |
| Dhel\P-element | FQ-RDVLEKMSKI                                               | ---MSS---  | EILGKSRKLPFQKG | ILVNNASLDG  |     |
| Dwil\P-element | IQ-NDILNRMSEI                                               | ---MRT---  | GILDKPKRLPFQKG | IIVNNASLDG  |     |
| Spal\P-element | FQ-RDVLEKMTQL                                               | ---MCS---  | DILGRSQKLPFQKG | IIVNNASLDG  |     |
| Hsap\THAP9     | ETYSKINHVLIEAKTIFVTLSDTSNNQIIKKGQKLGFL                      |            | G              | FLLNAESLKW  |     |
| Dana\Galileo   | KN-NNVHNYLVEMRKYFAEF                                        | -----KY--- | PQVVCIDG       | MMLTISSVLA  |     |
| Dpse\Galileo   | DK-NLVNETLSDMRKYFEEF                                        | -----KY--- | PQEVYCIK       | MILTINSILS  |     |
| Dper\Galileo   | DK-NLVNETLSDMRKYFEEF                                        | -----KY--- | PQEVYCIK       | MILTINSILS  |     |
| Dwil\Galileo   | KD-SDNEQYIEMRDYFKKC                                         | -----LY--- | RRKVYCLD       | GIVLSINAILM |     |
| Dvir\Galileo   | NN-NIKEKYITEMPNYFMKC                                        | -----RY--- | LKTVYCING      | LILTINSVLK  |     |
| Dmoj\GalileoC  | EN-NNVHEYLQEMRDYFLNL                                        | -----HY--- | PHKVYCIDG      | MMLTISSVIA  |     |
| Dmoj\GalileoD  | EK-NNIHEYLLEMRDYFKNL                                        | -----HY--- | PHKVYCIDG      | MIIITISSVIA |     |
| Dbuz\Galileo   | RN-NNVHEYLQEMRDYFHDL                                        | -----QY--- | PQKVYCIDG      | MIIITISSVIA |     |
| Dmel\1360      | VN-NGVWNKLEMQEYLKSV                                         | -----KY--  | HGNKIYCVD      | GLIQTTEAIFG |     |
| Dsim\1360      | VN-NAVWNKQKEMQEYLKSV                                        | -----KY--  | HGNKIYCVD      | GLIQTTEAIFG |     |
| Dsec\1360      | VN-NAVWNKLEMQEYLKSV                                         | -----KY--  | HGNKIYCVD      | GLIQTTEAIFG |     |
| Dere\1360      | FN-NTVWNKLEMQEYLRNV                                         | -----KY--  | HGNSIYCLD      | GLIQTTEAIFG |     |
| Dyak\1360      | VN-NTVWHKLEMQEYLRNV                                         | -----KY--  | HGNNIYCLD      | GLIQTTEAIFG |     |
| Dper\1360      | LN-NVPHKFIQFFLSYIKDV                                        | -----NFVDS | SKKRVYFLD      | GIQITLKSLLL |     |
| Dpse\1360      | LN-NVPHKFIQFFLSYIKDV                                        | -----NFVDS | SKKRVYFLD      | GIQITLKSLLL |     |
| Dvir\1360      | KE-NVVWKKLEMQVYLRNI                                         | -----RY--  | QGNLTYCIDG     | SLOTTEAIFG  |     |

|                |                                                             |     |                     |          |     |
|----------------|-------------------------------------------------------------|-----|---------------------|----------|-----|
|                | 760                                                         | 770 | 780                 | 790      | 800 |
|                | ..... ..... ..... ..... ..... ..... ..... ..... ..... ..... |     |                     |          |     |
| Dmel\P-element | LYK-YL-QENFSMQYILTSRLNQD                                    | I   | VEHFFGSMRSRGGQFDH   | PTPLQFKY |     |
| Dbif\P-element | LHA-YC-NEKYGMEYILTSRLNQD                                    | I   | VENFFGAMRAKGGQHDH   | PSPLQFKY |     |
| Dhel\P-element | LYI-YL-KDKYKMEYLLTSRLNQD                                    | I   | VDNFFGAMRSRGGQFDH   | PTPLQFKY |     |
| Dwil\P-element | LYK-YL-QENFSMQYILTSRLNQD                                    | I   | VEHFFGSMRSRGGQFDH   | PTPLQFKY |     |
| Spal\P-element | LFI-YL-KDKYNMEYLLTSRLNQD                                    | I   | VENFFGAMRSRGGQYDH   | PTPLQFKY |     |
| Hsap\THAP9     | LYQNYVFPKVMPPPYLLTYKFS                                      | H   | HLELFLKMLRQVLVTSSSP | CTMAFQK  |     |
| Dana\Galileo   | LSE-RVWS--SEIFYISTAKLNQD                                    | P   | LENLFYLLIRARGATNNN  | PLMSEFNN |     |
| Dpse\Galileo   | LAQ-NVWSESAEVFYIATSCLNQD                                    | P   | LENLFYLLIRSRGVTNNN  | PTMYEFNV |     |
| Dper\Galileo   | LAQ-NVWSESAEVFYIATSCLNQD                                    | P   | LENLFYLLIRSRGVTNNN  | PTMYEFNV |     |
| Dwil\Galileo   | LTS-DIWNEGHGVFFLMLSRLNQD                                    | A   | LEHVFYLLIRSRGGTNNN  | PMLFEFNA |     |
| Dvir\Galileo   | LSQ-DIWREDSNVFFLILSRLNQD                                    | A   | LENLFYLLIRDRGITYSN  | PKLFEFNA |     |
| Dmoj\GalileoC  | LAE-DIWNNNTDIFVATSCLNQD                                     | P   | LENLFYLLIRCRGGTNSN  | PTVFEFNT |     |
| Dmoj\GalileoD  | LAE-NIWSDNNDLFFVATSCLNQD                                    | P   | LENLFYLLIRSRGATNTN  | PTIFEFNS |     |
| Dbuz\Galileo   | LAE-NIWSDNNDLFFVATSCLNQD                                    | P   | LENLFYLLIRSRGATNTN  | PTIFEFNS |     |
| Dmel\1360      | LVE-DLFKDHTDHFFFLTSRVNQD                                    | P   | LENIFACVRAKGGNCRN   | PSVNEFNI |     |
| Dsim\1360      | LVE-DLFKDHADHFFFLTSRVNQD                                    | P   | LENIFACVRAKGSNCRN   | PSVNEFNI |     |
| Dsec\1360      | LVE-DLFKDHADHFFFLTSRVNQD                                    | P   | LENIFACVRAKGGNCRN   | PSVNEFNI |     |
| Dere\1360      | LVK-DIFRDHTDHFFFLTSRVNQD                                    | P   | LENIFACVRAKGGKCRN   | PSVNEFNI |     |
| Dyak\1360      | LVK-DIFKDHTDHFFFLTSRVNQD                                    | P   | LENIFACVRAKGGNCRN   | PSVNEFNV |     |
| Dper\1360      | LAD-ELLT-NSDKIFIMTKSLNQD                                    | K   | LENTFAVVRQKGGNNTN   | PSVAEINN |     |
| Dpse\1360      | LAD-ELLT-NSDKIFIMTKTLNQD                                    | K   | LENTFAVVRQKGGNNTN   | PSVAELKN |     |
| Dvir\1360      | LVD-DLFKDHPDNFFFLTSRINQD                                    | P   | LENIFASVRAKGGNCRN   | PSVYEFNI |     |



|                | 810     | 820      | 830      | 840     | 850            |
|----------------|---------|----------|----------|---------|----------------|
| Dmel\P-element | RLRKYII | -----    | -----    | -----   | GMTNLKE-CV     |
| Dbif\P-element | RLRKYIV | -----    | -----    | -----   | AKNTELLAG      |
| Dhel\P-element | RLKKYLI | -----    | -----    | -----   | AKNTELLRN      |
| Dwil\P-element | RLRKYII | -----    | -----    | -----   | ARNTEMLRN      |
| Spal\P-element | RLRKYLI | GMSNLEEL | CGVLCVLS | FMCFQFY | LIIFILYPAKNT   |
| Hsap\THAP9     | AYYNLET | -----    | -----    | -----   | RYKFDDEVFLSKVS |
| Dana\Galileo   | IMSKMLS | -----    | -----    | -----   | MKILTSKSV      |
| Dpse\Galileo   | IISKMLS | -----    | -----    | -----   | MKVLTSTTV      |
| Dper\Galileo   | IISKMLS | -----    | -----    | -----   | MKVLTSTTV      |
| Dwil\Galileo   | IISKMLS | -----    | -----    | -----   | MKLITSKTT      |
| Dvir\Galileo   | IISKMLS | -----    | -----    | -----   | MKIIFTAKIS     |
| Dmoj\GalileoC  | IISKMLS | -----    | -----    | -----   | MKMLTSASV      |
| Dmoj\GalileoD  | IISRMLS | -----    | -----    | -----   | MKILTSASV      |
| Dbuz\Galileo   | IISKMLS | -----    | -----    | -----   | MKVLTASAI      |
| Dmel\1360      | IIAKLIS | -----    | -----    | -----   | LHIFKF-SQ      |
| Dsim\1360      | IIAKLIS | -----    | -----    | -----   | LHIFKF-SQ      |
| Dsec\1360      | IIAKLIS | -----    | -----    | -----   | LHIFKF-SQ      |
| Dere\1360      | IIAKLIS | -----    | -----    | -----   | LHIFKF-SQ      |
| Dyak\1360      | IIAKLIS | -----    | -----    | -----   | LHIFKF-SQ      |
| Dper\1360      | IFARILN | -----    | -----    | -----   | IKIVCS-SD      |
| Dpse\1360      | IFAKILN | -----    | -----    | -----   | KLKIVRS-SD     |
| Dvir\1360      | IIAKLIS | -----    | -----    | -----   | LHIFHF-TK      |

|                | 860        | 870      | 880        | 890         | 900            |
|----------------|------------|----------|------------|-------------|----------------|
| Dmel\P-element | NKNVIPD    | NSESWLN  | LDFFSSKEN  | ENKSKDDEP   | VDDEPVDEMLS    |
| Dbif\P-element | NGNVDED    | NCDSWLN  | LNITPNGNKE | NEPDEGKWK   | GWSKEFEE       |
| Dhel\P-element | TGNVEED    | NFDSWLN  | LDFFSSK    | SLRNKPEDDE  | PEDEQOG        |
| Dwil\P-element | SGNIEED    | NSESWLN  | LDFFSSKEN  | ENKSKDDEP   | VDDEPVDEMLS    |
| Spal\P-element | TGNVAED    | NCDSWLN  | LDFNKSLEK  | KNKPED      | VEPEDVEPEDEADE |
| Hsap\THAP9     | IFDISIARRK | DALWTVQR | QYGVSVTK   | TVFHEEGICQ  | DWSHCSLSE      |
| Dana\Galileo   | SGNFGPD    | DDTMLIN  | VIQDCSTN   | KICNNLKT    | DEEESTDFDMFS   |
| Dpse\Galileo   | SGNCSPD    | EDTMLIN  | I IKDNV    | SSSESASESKT | FDDDILISTN     |
| Dper\Galileo   | SGNCSPD    | EDTMLIS  | I IKDNV    | SSSESASESKT | FDDDILISTN     |
| Dwil\Galileo   | TGNCEPD    | EDMLIN   | VI EETKHE  | LAIENVNDQD  | QVYEDFNII      |
| Dvir\Galileo   | SGNCQPN    | GEFMLV   | NVIELANE   | KCKAFVLR    | T---KNICPIT    |
| Dmoj\GalileoC  | SGNCIPD    | EDLMLAN  | I IKDSGS   | QLSVFHEQC   | NSCHTPTEI      |
| Dmoj\GalileoD  | SGNCIPD    | EDLMLAN  | I IEDSGS   | QLSVFHDQC   | NSRHATDIE      |
| Dbuz\Galileo   | SGNCILD    | EDSMLAN  | I IKDSGS   | TLSVVFHSQC  | EIHSSVYEE      |
| Dmel\1360      | KSNCESD    | DDVMLP   | IEFDSII    | YQPFVEKKEI  | QQQEYSV        |
| Dsim\1360      | KSNCESD    | DDVMLP   | IEFDSII    | YQPFIEKKEI  | QQQEYSV        |
| Dsec\1360      | KSNCESD    | DDVMLP   | IEFASII    | YQPFIEKKEI  | QQQEYSV        |
| Dere\1360      | KSNCESN    | DDVMLP   | IEFDSII    | YQPCVEKKEI  | QQEYSV         |
| Dyak\1360      | NSNCESD    | DDVMLP   | IEFDSII    | YQPCIEKKEI  | QQQEYSV        |
| Dper\1360      | FGNCEAD    | FEEGA    | AVQACIE    | GVFNESNNL   | KVEH-PNDHDELLS |
| Dpse\1360      | FGNCEAD    | FEEGIA   | VQACIE     | GVFNESNNL   | KDEH-PNHDELLS  |
| Dvir\1360      | KSNCESD    | DDVMLP   | VEFDSII    | YEPYENNESK  | VVPDNEFSV      |

|                |                                                                   |     |     |     |     |
|----------------|-------------------------------------------------------------------|-----|-----|-----|-----|
|                | 910                                                               | 920 | 930 | 940 | 950 |
|                | ..... ..... ..... ..... ..... ..... ..... ..... ..... ..... ..... |     |     |     |     |
| Dmel\P-element | -----EMDELTED--AMEYIAGYVIKK-----L                                 |     |     |     |     |
| Dbif\P-element | FEIEMDNNIAAEYIMDELTED--AMEYLAGYVVRK-----L                         |     |     |     |     |
| Dhel\P-element | IANNIPAVI---EIDELTED--GMD-VAGYVIKR-----R                          |     |     |     |     |
| Dwil\P-element | -----EMDELTED--AMEYIAGYVIKK-----L                                 |     |     |     |     |
| Spal\P-element | DDDCIANNIPADIEMDELTED--AIEYVAGYVIKR-----L                         |     |     |     |     |
| Hsap\THAP9     | -----ALLDLSDHRRNLICYAGYVANKLSALLTCEDCITALY                        |     |     |     |     |
| Dana\Galileo   | IEQIFDIA----TGNEFGSN--ALRYFAGYILFKFLQKND CGACAD-LL                |     |     |     |     |
| Dpse\Galileo   | LELSIEATDLS--IQAAFNEN--ALRYYAGYLLHKLLKKYDCNK CSE-LL               |     |     |     |     |
| Dper\Galileo   | LELSIEATDLS--IQAAFNEN--ALRYYAGYLLHKLLNKYDCNK CSE-LL               |     |     |     |     |
| Dwil\Galileo   | DEVSEADKEQPT-EISIATEN--SLKYFVGFVMHKAQQKFNC DTCKE-LL               |     |     |     |     |
| Dvir\Galileo   | TNVVCDNDDLPSVAISASSDN--ALRYFAGFVLDKSQQEFNC DTCKS-FL               |     |     |     |     |
| Dmoj\GalileoC  | IELSLD TTIAN--IQNDFNEN--ALRYFAGYLLHKLLQNTDCEV CTN-LL              |     |     |     |     |
| Dmoj\GalileoD  | IELSLD ATIAN--IQNAFNEN--ALRYFAGYLLHKLLQRTDCEV CTN-LL              |     |     |     |     |
| Dbuz\Galileo   | IELSLD STIVN--IQNAFNEN--ALRYFAGYLLHKLLQRTDCEV CTN-LL              |     |     |     |     |
| Dmel\1360      | NERYFDQNI DN F-LCNDVPIELTSSRYFVG YIAKG----SSCDKCRSVIL             |     |     |     |     |
| Dsim\1360      | NERYFDQNI DN F-LCNDVPIELTFSRYFVG YIAKG----SSCDKCRSVIL             |     |     |     |     |
| Dsec\1360      | NERYFDQNI DN F-LCNDVPIELTSSRYFVG YIAKG----SSCDKCRSVIL             |     |     |     |     |
| Dere\1360      | NERYFDQNI DN F-LCNDVPIELTSSRYFVG YIAKG----SSCDKCRSLIL             |     |     |     |     |
| Dyak\1360      | NERYFDQNI DN F-LCNDIPIELTSSRYFVG YIAKG----SSCDKCRSVIL             |     |     |     |     |
| Dper\1360      | FENYFEKDSEFK--TSKEINIEVASMRYFVG YVAFKTI PRLNFETCSKCMR             |     |     |     |     |
| Dpse\1360      | FENYFEKDSEFK--TSKEINIEVASMRYFXXXXAFKTI PRLNFETCSKCMR              |     |     |     |     |
| Dvir\1360      | NETYFDEHMDNM-LTNDLPIELTSSRYFVG YIAKG----SNCEK CQTYLI              |     |     |     |     |

|                |                                                             |     |     |     |      |
|----------------|-------------------------------------------------------------|-----|-----|-----|------|
|                | 960                                                         | 970 | 980 | 990 | 1000 |
|                | ..... ..... ..... ..... ..... ..... ..... ..... ..... ..... |     |     |     |      |
| Dmel\P-element | RISDKVKENLTF-----TYVDEVSHGG L IKPSEKFQEK LKELECI FLHYT      |     |     |     |      |
| Dbif\P-element | RLSNESTQS-GF-----TYVDEVSHGG L IKPSDQFTATLKHLESIFINNI        |     |     |     |      |
| Dhel\P-element | RMSDCKQSPTF-----TYVDEVSHGG L IKPSDQFKNKLKELKII FSHYT        |     |     |     |      |
| Dwil\P-element | RISDKVKENLTF-----TYVDEVSHGG L IKPSEKFQEK LKELECI FLHYT      |     |     |     |      |
| Spal\P-element | RLSDCLKQSSTF-----SYVDEVSTGG L LNRSDEFK NKLKELEII FSHFA      |     |     |     |      |
| Hsap\THAP9     | ASDLKASKIGSLLFVKKK-----NGLHFPSESLCRVINICERVV RTHS           |     |     |     |      |
| Dana\Galileo   | KKNIDAQSC TETFIINKNYDCADKTLK LKAPSDSFFSLIEIHFNVFKKIF        |     |     |     |      |
| Dpse\Galileo   | KSSDEVRC SSEYLILNKNFGYVSSSLK LKAPSEDFCTLVKIYFDIFNRHF        |     |     |     |      |
| Dper\Galileo   | KSSDEVRC SSEYLILNKNFGYVSSSLK LKAPSEDFCTLVKIYFDIFNRHF        |     |     |     |      |
| Dwil\Galileo   | KEEIANYE ESEFFIINKNFKTINNNLKL KAPQNH LFNLMKQHYKFFKNF-       |     |     |     |      |
| Dvir\Galileo   | KEENAKCEDSEYFLCNKNFKSINNRLKL KDPQDDFFCLIKHCYSIFQTIF         |     |     |     |      |
| Dmoj\GalileoC  | KSSDEMQC SSEYLILNKNFHYINRYLKL KAPSDHFY NLIKLHFESFRKIF       |     |     |     |      |
| Dmoj\GalileoD  | KSSDEMQC SSEYLILNKNYHYINKYLKL KAPSDLFY NMIKLHFETFKTIF       |     |     |     |      |
| Dbuz\Galileo   | KGSDEMQC SSEYLILNKNYNIHQYLKL KAPSDNFY NI IKIHFDFIQKIF       |     |     |     |      |
| Dmel\1360      | KETEHLTAPSELFIHEKNYSIESDFGKL KAPSDLFFNIYKIH IKA FENIF       |     |     |     |      |
| Dsim\1360      | KETEHLTAPSELFIHEKNYSIDSDFGKL KAPSDLFFNICKIHIKVFENIF         |     |     |     |      |
| Dsec\1360      | KETEHLTAPSELFIHEKNYSIDSDFGKL KAPSDLFFNICKIHIKVFENIF         |     |     |     |      |
| Dere\1360      | KESEHLTAPSELFIHEKNYWI ESDFGKL KAPSDLFFNICKIHIKVFENIF        |     |     |     |      |
| Dyak\1360      | KETEHLTAPSELFIHEKNYSTESDFGKL KAPSDLFFNICKIHIKVFENIF         |     |     |     |      |
| Dper\1360      | KEDEVITVPSELFI FYKNYQKFTDFGSL IAPSDCLMEISKKHILIFCKFF        |     |     |     |      |
| Dpse\1360      | KEDKVITVPSELFI FYKNYQKFTDFGSL IAPSDCLMEISKKHILIFCKFF        |     |     |     |      |
| Dvir\1360      | KNSEFLTAPSEQFISEKNYSKDTDFGNL KAPSDLFFNNSKIHIKVF DNIF        |     |     |     |      |

|                | 1010                                  | 1020                                      | 1030 | 1040 | 1050    |
|----------------|---------------------------------------|-------------------------------------------|------|------|---------|
| Dmel\P-element | NNN-----                              | NFEITNNVKEKLILAARNVDVDKQVKSF              |      |      | YFKIR-- |
| Dbif\P-element | HNT-----                              | IEITKDIKKKLLIAAKHVQIDNNVKQF               |      |      | YFKTR-- |
| Dhel\P-element | KEK-----                              | FEITNNLKEKL--AAQNVELDKLVISF               |      |      | YFKMR-- |
| Dwil\P-element | NNN-----                              | NFEITNNVKEKLILAARNVDVDKQVKSF              |      |      | YFKIR-- |
| Spal\P-element | KDNFQVTNNNFKVTNNLKEKLVVAAQNVELDKLVISF |                                           |      |      | YFKIR-- |
| Hsap\THAP9     | RMA-----                              | IFELVSKQRELYLQOKILCELSGHINLFVDVNKHLFDGEVC |      |      |         |
| Dana\Galileo   | DKK-----                              | PYINRIKKTIIQSCISSTEKSSIIYSD               |      |      | WFSVTHP |
| Dpse\Galileo   | ETK-----                              | SHKFNLKRSIVQKCIILTSKIDKYAD                |      |      | WFKFSDP |
| Dper\Galileo   | ETK-----                              | SHKFNLKRSIVQKCIILTSKIDKYAD                |      |      | WFKFSDP |
| Dwil\Galileo   | -----                                 | PHARKIKEKIINECLSNIEKDPNYLD                |      |      | WYSESHE |
| Dvir\Galileo   | QKS-----                              | QHVRQKKRRELTIIYECISRNKAFEKFNAN            |      |      | WFSESHS |
| Dmoj\GalileoC  | EKK-----                              | PYIARIKEKIVLYCMHATAKSSLDNE                |      |      | WFSPTHP |
| Dmoj\GalileoD  | EKK-----                              | PYMPRIKEKIVLYCMHATAKSSLDTE                |      |      | WFSPTHP |
| Dbuz\Galileo   | DKK-----                              | PFIAKLKEKIILHCMRATAKSTLHSD                |      |      | WFSPSHP |
| Dmel\1360      | KNN-----                              | KKQMCIKKFIVEQCIKCTNESSAFPL                |      |      | WFYENNE |
| Dsim\1360      | KNN-----                              | KKQMCIKKFIVEQCIKCTNESSAFSL                |      |      | WFYENNE |
| Dsec\1360      | KNN-----                              | KKQMCIKKFIVEQCIKCTNESSAFSL                |      |      | WFYENNE |
| Dere\1360      | KNN-----                              | KKRRCIKQFIVEQCIKCTNKSSDFSL                |      |      | WFHSNND |
| Dyak\1360      | KNN-----                              | KKQMCIQKFIVDQCIKCTNESSDFSL                |      |      | WFHVENE |
| Dper\1360      | EIG-----                              | PQKVGIKNLILKACQDETPL                      |      |      | WFTGE-- |
| Dpse\1360      | EIG-----                              | PQKVGIKNLILKACQDETPL                      |      |      | WFTGE-- |
| Dvir\1360      | STN-----                              | KMQLNIKKCIIEQCIKCT-KESVYSS                |      |      | WFDENDS |

|                | 1060                                              | 1070 | 1080 | 1090 | 1100  |
|----------------|---------------------------------------------------|------|------|------|-------|
| Dmel\P-element | -IYFRIKYFNKKIEIKNQKQ                              |      |      |      |       |
| Dbif\P-element | -IYFRLKYLNKKLAIKNQKQ                              |      |      |      |       |
| Dhel\P-element | -IYLRVKYLNKKMYIKNQKR                              |      |      |      |       |
| Dwil\P-element | -IYFRIKYFNKKIEIKNQKQ                              |      |      |      |       |
| Spal\P-element | -IYFRVKYLNKKICIKNQKQ                              |      |      |      |       |
| Hsap\THAP9     | AINHFVKLLKDIICFLNIRAKNVAQNPLKHHSERTDMKTLSRKHWSSVQ |      |      |      |       |
| Dana\Galileo   | CYEHRMKMLNGFILILLRKNKSK                           |      |      |      | WLTEK |
| Dpse\Galileo   | CFVHRNHLLNQFVLILIRKNFK                            |      |      |      | WLTDR |
| Dper\Galileo   | CFVHRNHLLNQFVLILIRKNCK                            |      |      |      | WLTDR |
| Dwil\Galileo   | CSEHRKFILNYFLLVLLKKNKSK                           |      |      |      | WLMES |
| Dvir\Galileo   | CSHHRKYILNYVLQVLFRDNSI                            |      |      |      | WLIK  |
| Dmoj\GalileoC  | CFEHRKSILNQFVLILIRKNCK                            |      |      |      | WQTEK |
| Dmoj\GalileoD  | CFEHRKFILNQFVLILIRKNCK                            |      |      |      | WQTEK |
| Dbuz\Galileo   | CFDHRKFMLNQFVLILIRKNCK                            |      |      |      | WLTDS |
| Dmel\1360      | CYAHRTDLLNKLIKVLLFKHCK                            |      |      |      | WTVIA |
| Dsim\1360      | CYAHRTDLLNKLIKVLLFKHCK                            |      |      |      | WTVMI |
| Dsec\1360      | CYAHRTDLLNKLIKVLLFKHCK                            |      |      |      | WTVMI |
| Dere\1360      | CYVHKIDILNKLIKVLLFKHCK                            |      |      |      | WTVTA |
| Dyak\1360      | CYEHKIDLLKLIKVLLFKHCK                             |      |      |      | WTVIA |
| Dper\1360      | CREHKLALLDFVILVLLRKHSL                            |      |      |      | WAIRR |
| Dpse\1360      | CREHKLALLDFVILVLLRKHSL                            |      |      |      | WAIRR |
| Dvir\1360      | CFTHKISLLDKLIKVLLFKHCK                            |      |      |      | WTVMT |

```

          1110          1120
    . . . . | . . . . | . . . . | . . . . | . . . . | .
Dmel\P-element  -----KLIGNSKLLKIKL-----
Dbif\P-element  -----RLVGNSKLLKIKL-----
Dhel\P-element  -----RLIGNSKLLKIKL-----
Dwil\P-element  -----KLIGNSKLLKIKL-----
Spal\P-element  -----RLIGNSKLLKIKL-----
Hsap\THAP9      DYKCSSFANTSSKFRHLLSNDGYPFK
Dana\Galileo    MSKEKAVSTASSRKLKILKE-----
Dpse\Galileo    MIGNQN-AKSYEKKLIKILRQ-----
Dper\Galileo    MIGNQN-AKSYEKKLIKILRQ-----
Dwil\Galileo    LCGASE-KHKSNRKIEILQS-----
Dvir\Galileo    LCGLSE-NPSSARKEKIVQS-----
Dmoj\GalileoC   IVGK---TSISKRKLKIIHQ-----
Dmoj\GalileoD   IVGK---TSISKRKLKIIHQ-----
Dbuz\Galileo    IVSKS--SNLSKSKLKMIRE-----
Dmel\1360       D-----RQKKQAKLSILSHE-----
Dsim\1360       AD-----RQKKQAKLSILSHK-----
Dsec\1360       AD-----KQKKQAKLSILSHK-----
Dere\1360       D-----KQKKQAKLSILSHK-----
Dyak\1360       N-----RQKSQAKLSILSHK-----
Dper\1360       G-----KKNASKKLIKIMAQ-----
Dpse\1360       G-----KKNASKKLIKIMAQ-----
Dvir\1360       D-----SYKKKAKLNILSHK-----

```
