# Supplementary material
Source: PubMed Central journal article supplement (PMC2268567)
Supplement: pnas_0712110105_3.pdf [file pnas_0712110105_3.pdf]

A

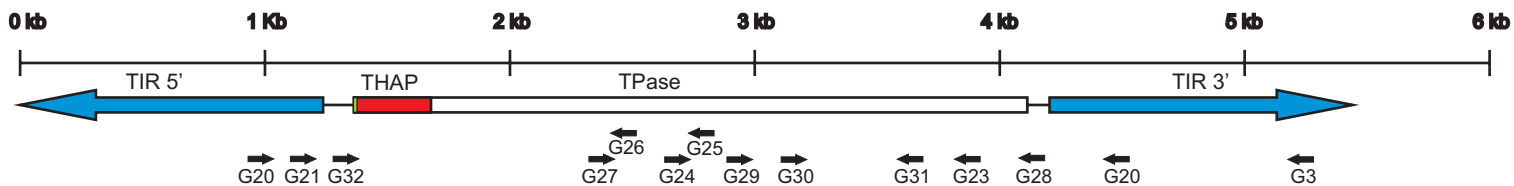

B

| PCR product name |  | PCR product length | Sequencing primers                       |
|------------------|--|--------------------|------------------------------------------|
| G24-G3           |  | 2575 bp            | G3, G23, G24, G20                        |
| G20-G25          |  | 1761 bp            | G25, G26, G20, G21                       |
| G27-G28          |  | 1890 bp            | M13F, M13R, G29                          |
| G20-G31          |  | 2757 bp            | M13F, M13R, G21, G24, G26, G27, G30, G32 |

C

| Primer | Sequence (5'-3')        |
|--------|-------------------------|
| G3     | CAAATCATTCCGCTTCGAG     |
| G20    | CAATCGCCGAGTATCACTTGT   |
| G21    | CGCAAATTCAGGTCACATATAAC |
| G23    | TGTAAGGTTGATTTAGCAGTAGC |
| G24    | ATATTGGACTATCGCAAGCAT   |
| G25    | GCCCTGAGTTGTGGAGATGT    |
| G26    | ACACAGACCTGCTGACCTAGAA  |
| G27    | CTAATCCAGAGTTGCTAGAA    |
| G28    | CATCCGTTATGTAGACATATT   |
| G29    | GCATAACATCTCCACAACCTCAG |
| G30    | ATGTGCATGAATACCTTCAGGA  |
| G31    | CAGTTCCTTTGCAACAGCTTGTG |
| G32    | TTGACACTCAACTTCCGA      |
| M13F   | GTAAAACGACGGCCAG        |
| M13R   | CAGGAAACAGCTATGAC       |
