# Supplementary material
Source: PubMed Central journal article supplement (PMC2268567)
Supplement: pnas_0712110105_8.pdf [file pnas_0712110105_8.pdf]

**Table 5. Short nonautonomous copies of *Galileo* characterized in the genomes of six *Drosophila* species**

| Species             | Contig | Beginning | Total length | TIRa/TIRb length | TSD     | Observations |
|---------------------|--------|-----------|--------------|------------------|---------|--------------|
| <i>D. ananassae</i> | 16072  | 49428     | 1145         | 317/317          | ATAGTAG | —            |
|                     | 16215  | 13660     | 1226         | 329/329          | GTAATAC | —            |
|                     | 16457  | 13174     | 1220         | 329/329          | GTTATAT | —            |
|                     | 16780  | 48830     | 1194         | 331/331          | CATCAAC | —            |
|                     | 16799  | 18339     | 1194         | 331/331          | GTAGCAG | —            |
|                     | 17082  | 56734     | 1228         | 318/320          | GTTTCGT | —            |
|                     | 18115  | 31181     | 1233         | 329/329          | ATTATAG | —            |
|                     | 18348  | 28163     | 1225         | 329/329          | CTACGAG | —            |
|                     | 18752  | 112063    | 1236         | 329/329          | GTATAAT | —            |
|                     | 18811  | 266133    | 1244         | 329/328          | GATGAAC | —            |
|                     | 18844  | 8374      | 1254         | 329/340          | CTTTTAT | —            |
|                     | 18855  | 7980      | 1245         | 329/329          | GTATTAT | —            |
|                     | 19356  | 469604    | 1219         | 329/329          | ACTGTAC | —            |
|                     | 19465  | 81512     | 1158         | 329/317          | GTATAGT | —            |
|                     | 19598  | 190010    | 1236         | 329/329          | CTTGTAC | —            |
|                     | 19813  | 40154     | 1236         | 329/329          | GTTCAAC | —            |
|                     | 19892  | 26883     | 1236         | 329/329          | GTATAAC | —            |
|                     | 20116  | 42794     | 1227         | 331/330          | ACCAAAC | —            |
| 20508               | 21472  | 1194      | 331/330      | CTGCAAC          | —       |              |

| Species                 | Contig | Beginning | Total length | TIRa/TIRb length | TSD             | Observations                      |
|-------------------------|--------|-----------|--------------|------------------|-----------------|-----------------------------------|
| <i>D. pseudoobscura</i> | 20509  | 13568     | 1208         | 329/304          | GTGCAAG         | —                                 |
|                         | 1082   | 770       | 2899         | 462/464          | GTTCAAC         | —                                 |
|                         | 3611   | 65029     | 4538         | 545/541          | GTAATAT/GTTCTAT | —                                 |
|                         | 3949   | 17417     | 1095         | 515/417          | ATAAATG         | —                                 |
|                         | 4181   | 261898    | 2106         | 664/630          | GTTCTAT         | Worf insertion (263302-264678)    |
|                         | 4197   | 39495     | 2439         | 629/630          | GTAGTAC         | —                                 |
|                         | 4227   | 206109    | 1982         | 552/552          | CTTCTGC         | —                                 |
|                         | 4314   | 60436     | 4458         | 543/545          | GTTCTAT         | —                                 |
|                         | 4350   | 119298    | 1975         | 514/514          | ATTCGAC         | —                                 |
|                         | 4355   | 300467    | 4085         | 528/493          | CTTTCAC/GTGAGAC | —                                 |
|                         | 4360   | 196165    | 2036         | 630/629          | ATAAGAC         | —                                 |
|                         | 4568   | 59125     | 2036         | 630/629          | GCTAAAG         | —                                 |
|                         | 4925   | 27994     | 2024         | 623/623          | GTATACT         | —                                 |
|                         | 5286   | 303008    | 2059         | 778/778          | GTTTAAC         | Insertion in TIRb (304447-304982) |
|                         | 5301   | 784883    | 2059         | 630/658          | CTACTAT         | —                                 |
|                         | 5346   | 39465     | 1954         | 561/624          | GTAATAT         | —                                 |
|                         | 5574   | 101925    | 3481         | 662/630          | ATAGCAT         | —                                 |
| 5598                    | 108632 | 2032      | 630/629      | GTAATAT          | —               |                                   |
| 5611                    | 88815  | 1610      | 536/535      | GTTGAGG          | —               |                                   |
| <i>D. persimilis</i>    | 43     | 22757     | 1892         | 555/565          | GTTGAAT         | —                                 |

| Species              | Contig | Beginning | Total length | TIRa/TIRb length | TSD     | Observations |
|----------------------|--------|-----------|--------------|------------------|---------|--------------|
|                      | 497    | 41905     | 1893         | 558/549          | ATTATAC | —            |
|                      | 661    | 13659     | 2012         | 737/733          | GTTGTAC | —            |
|                      | 1311   | 29484     | 2087         | 550/555          | ATAGCAC | —            |
|                      | 1330   | 56295     | 1957         | 515/515          | ATTGTAC | —            |
|                      | 1462   | 9134      | 1908         | 559/559          | ATAAAAC | —            |
|                      | 1531   | 30035     | 1949         | 725/719          | TTGATGG | —            |
|                      | 2315   | 58360     | 1901         | 558/557          | ATATGAC | —            |
|                      | 2841   | 31815     | 2005         | 555/553          | GTACAAC | —            |
|                      | 3304   | 10212     | 1961         | 613/562          | GCAAGTC | —            |
|                      | 4090   | 14313     | 1758         | 541/541          | ACCAACC | —            |
|                      | 4609   | 1009      | 1902         | 559/569          | GTAATAC | —            |
|                      | 5516   | 10726     | 2097         | 557/557          | GTTTTCG | —            |
|                      | 6330   | 22364     | 1865         | 573/556          | GTAGTAG | —            |
|                      | 9153   | 14702     | 1935         | 566/566          | CCGCAAA | —            |
|                      | 9474   | 6659      | 1992         | 543/552          | CTTTCAT | —            |
|                      | 10757  | 7184      | 2022         | 737/743          | GTATATA | —            |
|                      | 11506  | 169       | 1946         | 727/725          | GTTGTGC | —            |
| <i>D. willistoni</i> | 191    | 7706      | 1133         | 483/475          | ATATTAG | —            |
|                      | 4171   | 163       | 1140         | 475/475          | GTATAAC | —            |
|                      | 6280   | 219672    | 1126         | 517/517          | TGCAAAG | —            |

| Species | Contig | Beginning | Total length | TIRa/TIRb length | TSD             | Observations                      |
|---------|--------|-----------|--------------|------------------|-----------------|-----------------------------------|
|         | 6423.1 | 286322    | 1452         | 624/620          | GTATTAG         | —                                 |
|         | 6423.2 | 472923    | 1120         | 476/476          | ATTATAT         | —                                 |
|         | 6463.1 | 759004    | 1141         | 475/483          | GTATTAG         | —                                 |
|         | 6463.2 | 269200    | 1142         | 485/487          | ATCGTTT/ATCGTAT | 38-bp repeat at end of TIRb       |
|         | 6463.3 | 165185    | 1132         | 492/484          | ATATTAG         | —                                 |
|         | 6661   | 512446    | 1269         | 522/528          | CTAAAAC         | —                                 |
|         | 6834   | 123142    | 1105         | 517/521          | ATTCTGC         | —                                 |
|         | 6840   | 36681     | 1130         | 519/519          | CTTGAAG         | —                                 |
|         | 6847   | 108816    | 1114         | 518/517          | GTATTGA         | —                                 |
|         | 6851   | 324389    | 1124         | 517/517          | CCTTAC          | —                                 |
|         | 7963   | 399697    | 1196         | 557/557          | CTACTGC         | —                                 |
|         | 8445   | 45999     | 1140         | 518/518          | ATAGAAC         | —                                 |
|         | 8628   | 277645    | 1133         | 475/483          | ATATTAC         | —                                 |
|         | 9000   | 395296    | 1133         | 483/475          | GTCAAAG         | —                                 |
|         | 9436   | 199308    | 1109         | 482/490          | CTTCTAC         | —                                 |
|         | 9906   | 5225      | 1422         | 482/483          | GTATTAG         | —                                 |
|         | 10422  | 27432     | 1402         | 476/475          | ATAACAG/CTCTAAC | —                                 |
|         | 13546  | 3646      | 1991         | 852/990          | GTAATAC         | Insertion within TIRa (3665-4506) |
|         | 13964  | 226944    | 1602         | 709/696          | ACTGAAC/GCGATAG | —                                 |
|         | 14705  | 256157    | 1339         | 584/400          | ATATTAT         | —                                 |

| Species              | Contig  | Beginning | Total length | TIRa/TIRb length | TSD             | Observations                                                   |
|----------------------|---------|-----------|--------------|------------------|-----------------|----------------------------------------------------------------|
| <i>D. mojavensis</i> | 15758   | 236804    | 2232         | 785/785          | CTTAAAC         | —                                                              |
|                      | 16069   | 102584    | 1480         | 608/614          | ACTTAAC         | —                                                              |
|                      | 16071   | 203037    | 2343         | 1051/1003        | GTAACAG         | —                                                              |
|                      | 16072   | 413871    | 1774         | 795/839          | GTATAAT/-       | 5 terminal bp and TSD missing from TIRb                        |
|                      | 16403   | 21843     | 1635         | 725/730          | ATCGAGC/ATGCTGC | —                                                              |
|                      | 17557   | 39646     | 1882         | 824/832          | -/ATTACCA       | 12 terminal bp and TSD missing from TIRa                       |
|                      | 17577   | 4833      | 1247         | 305/307          | GTAATAG         | —                                                              |
|                      | 17588   | 42042     | 1616         | 699/687          | CAAGCAA         | GTG is repeated between end of TIR and TSD                     |
|                      | 17658   | 62428     | 1947         | 710/723          | GTGATAC/CCATAAG | —                                                              |
|                      | 18052   | 6453      | 1597         | 698/722          | GTATTAC         | —                                                              |
|                      | 8189    | 12012     | 2382         | 894/894          | GTGCAGC         | 124-bp internal direct repeats                                 |
|                      | 8783    | 2229      | 2162         | 1039/990         | CTATAAC         | Insertion in TIRa (2503-4931)                                  |
|                      | 9647    | 4614      | 1903         | 578/578          | ATTGAA          | —                                                              |
|                      | 9832    | 28557     | 1600         | 577/565          | GTGATAT/AATACAC | —                                                              |
|                      | 10246   | 221912    | 2826         | 1116/1116        | GTATTTT         | Two 220-bp repeats in each TIR; 127-bp internal direct repeats |
|                      | 10309   | 10744     | 2426         | 1147/1153        | GTACCGC         | Two 220-bp repeats in each TIR                                 |
|                      | 10727.1 | 44829     | 2206         | 1028/1030        | TCATTAC         | —                                                              |
| 10727.2              | 104767  | 3214      | 1260/1214    | GTATTAT          | —               |                                                                |

| Species              | Contig  | Beginning | Total length | TIRa/TIRb length | TSD             | Observations                                                                                                                                                                                     |
|----------------------|---------|-----------|--------------|------------------|-----------------|--------------------------------------------------------------------------------------------------------------------------------------------------------------------------------------------------|
|                      | 10741   | 55570     | 3363         | 1216/987         | ATATGTA/CTAATTG | TIRa has three copies of 220-bp repeat. TIRb has only two. Immediately upstream of this copy there is another TIR 813 bp long with two copies of 220-bp repeat flanked by 7-bp sequence CTATAAC. |
| <i>D. mojavensis</i> | 10751   | 25070     | 2195         | 1021/1026        | TGTATAC         | —                                                                                                                                                                                                |
|                      | 10758.2 | 55001     | 1660         | 486/508          | GTTATGC         | 119-bp end duplication in TIRb                                                                                                                                                                   |
|                      | 10764   | 29199     | 2369         | 715/715          | TTTATAT         | Insertion in TIRb (35259-35358); ISBu insertion (30625-34928)                                                                                                                                    |
|                      | 10770.2 | 92188     | 3199         | 1107/1107        | ATAGTAG/CTACTAT | —                                                                                                                                                                                                |
|                      | 10790.1 | 49101     | 1967         | 556/494          | ATACTAC         | —                                                                                                                                                                                                |
|                      | 10790.2 | 84962     | 2199         | 1022/1028        | TCGAAAC         | —                                                                                                                                                                                                |
|                      | 10940   | 39859     | 1547         | 458/458          | ATTGGGG         | —                                                                                                                                                                                                |
|                      | 10945   | 2811      | 2179         | 1033/997         | GATACAC         | Insertion in TIRb (4741-5878)                                                                                                                                                                    |
|                      | 11229   | 48344     | 1736         | 769/766          | TTAATGC         | —                                                                                                                                                                                                |
|                      | 11267   | 12789     | 2355         | 627/616          | GTATCAA         | —                                                                                                                                                                                                |
|                      | 11679   | 95650     | 2174         | 1012/1014        | TTATGAG         | ISBu insertion in TIRb (97089-97880)                                                                                                                                                             |

TIRa is the first TIR that appears in the contig and TIRb is the other one. When both TSD are exactly the same, only one sequence is given. Total length is given in bp.
