# Supplementary material
Source: PubMed Central journal article supplement (PMC2268567)
Supplement: pnas_0712110105_10.pdf [file pnas_0712110105_10.pdf]

**Table 7. Complete and nearly complete 1360 transposable elements found in different *Drosophila* species**

| Species                 | Contig | Coordinates     | Orientation | Transposase     | TIRa/ TIRb | TSD                | Total length | Insertions         |
|-------------------------|--------|-----------------|-------------|-----------------|------------|--------------------|--------------|--------------------|
| <i>D. melanogaster</i>  | Chr. 4 | 809215-812470   | Inverted    | 812470-809907   | -/31       | GCCATAC/-          | 3615         | —                  |
| <i>D. simulans</i>      | Chr. U | 8185141-8188796 | Inverted    | 8188307-8185783 | -/31       | CCCGAAC/-          | 3656         | —                  |
| <i>D. sechellia</i>     | 5259   | 961-5382        | Direct      | 2194-4726       | 31/31      | GTTGAC/<br>ATTCCAC | 4422         | —                  |
| <i>D. erecta</i>        | 7407   | 137172-141324   | Inverted    | 140279-137852   | 31/31      | GTTTGAC            | 4153         | —                  |
| <i>D. yakuba</i>        | 0.40   | 344624-349004   | Direct      | 345812-348373   | 31/31      | GTCAAAG            | 4381         | —                  |
| <i>D. pseudoobscura</i> | 784    | 22941-26100     | Direct      | 23339-25777     | 31/32      | ATCATAT            | 3160         | —                  |
| <i>D. persimilis</i>    | 9857   | 64151-67135     | Inverted    | 66929-64479     | 32/31      | ATATGAT            | 2985         | —                  |
| <i>D. virilis</i>       | 17537  | 32378-37583     | Inverted    | 33160-36198     | 32/31      | GTTTGAC            | 4702         | LINE (33361-33864) |

TIRa is the TIR at the 5' side of the transposase while TIRb designates the TIR at its 3' end. TSDs are given in the same orientation they have in the contig.
