# Supplementary material
Source: PubMed Central journal article supplement (PMC2268567)
Supplement: pnas_0712110105_11.pdf [file pnas_0712110105_11.pdf]

**Table 8. Comparison among the TPase proteins from different species**

| Species                 | L   | 1    | 2    | 3    | 4    | 5    | 6    | 7    | 8    | 9    | 10   | 11   | 12   | 13   | 14   | 15   | 16   | 17   | 18   | 19  | 20  | 21  | 22  |
|-------------------------|-----|------|------|------|------|------|------|------|------|------|------|------|------|------|------|------|------|------|------|-----|-----|-----|-----|
| <b>1. Dana\Galileo</b>  | 889 |      | 885  | 879  | 881  | 880  | 886  | 885  | 883  | 834  | 838  | 836  | 834  | 833  | 794  | 799  | 836  | 722  | 726  | 718 | 723 | 735 | 807 |
| <b>2. Dpse\Galileo</b>  | 908 | 56.2 |      | 902  | 893  | 899  | 897  | 896  | 895  | 839  | 841  | 841  | 840  | 838  | 797  | 802  | 839  | 722  | 728  | 718 | 723 | 740 | 808 |
| <b>3. Dper\Galileo</b>  | 902 | 55.6 | 97.2 |      | 887  | 893  | 891  | 890  | 889  | 833  | 835  | 835  | 834  | 832  | 791  | 796  | 833  | 716  | 722  | 712 | 717 | 734 | 802 |
| <b>4. Dwi\Galileo</b>   | 910 | 42.3 | 41.7 | 41.5 |      | 888  | 902  | 901  | 898  | 836  | 840  | 838  | 836  | 835  | 795  | 800  | 838  | 718  | 726  | 715 | 719 | 735 | 806 |
| <b>5. Dvir\Galileo</b>  | 938 | 41.6 | 39.9 | 39.4 | 52.3 |      | 909  | 908  | 886  | 836  | 838  | 838  | 837  | 835  | 792  | 797  | 836  | 723  | 730  | 718 | 724 | 744 | 806 |
| <b>6. Dmoj\GalileoC</b> | 937 | 55.6 | 52.8 | 52.1 | 43.1 | 40.0 |      | 936  | 905  | 840  | 844  | 842  | 840  | 839  | 800  | 805  | 842  | 724  | 731  | 721 | 725 | 740 | 809 |
| <b>7. Dmoj\GalileoD</b> | 936 | 57.2 | 55.0 | 54.3 | 43.3 | 41.0 | 87.3 |      | 904  | 839  | 843  | 841  | 839  | 838  | 799  | 804  | 841  | 723  | 730  | 720 | 724 | 739 | 808 |
| <b>8. Dbuз\Galileo</b>  | 912 | 58.3 | 56.2 | 55.6 | 41.8 | 40.9 | 72.4 | 74.0 |      | 837  | 840  | 839  | 837  | 836  | 796  | 801  | 838  | 723  | 729  | 719 | 724 | 739 | 808 |
| <b>9. DmeN\360</b>      | 854 | 34.7 | 32.2 | 32.2 | 33.9 | 31.1 | 34.4 | 34.7 | 34.4 |      | 854  | 854  | 853  | 852  | 797  | 802  | 853  | 721  | 727  | 716 | 721 | 738 | 798 |
| <b>10. Dsim\360</b>     | 858 | 34.6 | 31.6 | 31.6 | 33.1 | 30.9 | 33.2 | 33.7 | 33.1 | 93.8 |      | 856  | 854  | 853  | 800  | 805  | 856  | 723  | 730  | 719 | 723 | 739 | 802 |
| <b>11. Dsec\360</b>     | 856 | 34.7 | 32.1 | 32.1 | 33.8 | 30.4 | 34.2 | 34.4 | 33.8 | 94.8 | 96.1 |      | 854  | 853  | 798  | 803  | 854  | 722  | 728  | 717 | 722 | 739 | 800 |
| <b>12. Dere\360</b>     | 854 | 35.4 | 32.1 | 32.1 | 32.8 | 31.1 | 35.0 | 35.2 | 34.6 | 88.7 | 86.8 | 88.3 |      | 852  | 797  | 802  | 853  | 721  | 727  | 716 | 721 | 739 | 798 |
| <b>13. Dyak\360</b>     | 853 | 35.4 | 31.5 | 31.4 | 32.9 | 30.9 | 34.7 | 34.8 | 34.6 | 88.8 | 87.0 | 88.2 | 91.7 |      | 797  | 802  | 852  | 722  | 728  | 717 | 722 | 739 | 799 |
| <b>14. Dpse\360</b>     | 818 | 35.0 | 33.2 | 33.2 | 32.6 | 30.3 | 33.5 | 34.0 | 33.9 | 35.4 | 34.1 | 35.1 | 35.1 | 35.4 |      | 811  | 804  | 695  | 703  | 691 | 695 | 710 | 764 |
| <b>15. Dper\360</b>     | 817 | 35.3 | 33.7 | 33.7 | 33.3 | 30.6 | 34.0 | 34.7 | 34.3 | 35.9 | 34.5 | 35.5 | 35.5 | 35.8 | 98.0 |      | 799  | 691  | 698  | 686 | 690 | 706 | 760 |
| <b>16. Dvir\360</b>     | 856 | 34.7 | 32.4 | 32.4 | 32.7 | 29.5 | 33.8 | 33.9 | 33.9 | 71.7 | 70.4 | 71.5 | 72.5 | 72.5 | 34.8 | 34.5 |      | 722  | 729  | 718 | 722 | 738 | 800 |
| <b>17. DmeNP</b>        | 751 | 23.1 | 24.2 | 24.0 | 22.3 | 21.2 | 23.8 | 24.6 | 25.3 | 23.2 | 22.3 | 23.0 | 22.7 | 22.7 | 23.3 | 22.9 | 23.3 |      | 736  | 735 | 750 | 749 | 718 |
| <b>18. DbifNP</b>       | 757 | 23.1 | 23.4 | 23.5 | 22.7 | 21.1 | 24.6 | 24.7 | 24.8 | 23.4 | 23.0 | 22.9 | 22.1 | 22.9 | 23.6 | 23.2 | 23.0 | 66.7 |      | 740 | 737 | 754 | 714 |
| <b>19. DheNP</b>        | 746 | 22.7 | 22.8 | 22.9 | 22.1 | 20.1 | 23.9 | 24.0 | 24.1 | 23.2 | 22.7 | 22.6 | 21.9 | 22.3 | 22.3 | 22.0 | 22.6 | 75.0 | 66.5 |     | 736 | 743 | 704 |

| Species              | L   | 1    | 2    | 3    | 4    | 5    | 6    | 7    | 8    | 9    | 10   | 11   | 12   | 13   | 14   | 15   | 16   | 17   | 18   | 19   | 20   | 21   | 22  |
|----------------------|-----|------|------|------|------|------|------|------|------|------|------|------|------|------|------|------|------|------|------|------|------|------|-----|
| 20. <i>DwiNP</i>     | 751 | 22.5 | 23.7 | 23.4 | 22.3 | 21.1 | 23.0 | 23.9 | 24.9 | 23.2 | 22.3 | 23.0 | 22.7 | 22.6 | 23.3 | 22.9 | 23.4 | 98.1 | 66.9 | 75.7 |      | 749  | 718 |
| 21. <i>SpaNP</i>     | 830 | 23.4 | 23.1 | 23.2 | 22.3 | 20.3 | 23.6 | 23.8 | 24.5 | 24.0 | 23.4 | 23.5 | 22.7 | 23.0 | 22.0 | 21.5 | 22.8 | 74.0 | 66.2 | 87.2 | 74.6 |      | 731 |
| 22. <i>Hsa\THAP9</i> | 903 | 20.9 | 20.9 | 21.1 | 19.1 | 19.1 | 20.5 | 20.3 | 20.4 | 18.8 | 18.7 | 18.6 | 18.9 | 19.9 | 18.1 | 17.6 | 19.1 | 21.0 | 19.2 | 20.6 | 21.0 | 20.1 |     |

TPase length (L, first column), number of aligned amino acids omitting gaps (above diagonal), and percent identical amino acids (below diagonal) in pairwise comparisons between the sequences of the *Drosophila* 21 TPases (8 from *Galileo*, 8 from *I360*, and 5 from *P* element) and the THAP containing 9 proteins from *Homo sapiens*. The global alignment of the 22 protein sequences comprised 1,126 positions.
