# Supplementary material
Source: PubMed Central journal article supplement (PMC2268567)
Supplement: pnas_0712110105_12.pdf [file pnas_0712110105_12.pdf]

**Table 9. Sequences used to construct the consensus transposases of *Galileo* and *I360* in the different species**

**A. *Galileo* sequences**

| <b>Species</b>          | <b>Contig</b> | <b>Coordinates</b> |
|-------------------------|---------------|--------------------|
| <i>D. ananassae</i>     | 9736          | 951-1              |
|                         | 11169         | 745-2142           |
|                         | 15556         | 3049-5748          |
|                         | 15979         | 73038-74395        |
|                         | 16864         | 8193-6713          |
|                         | 19410         | 8996-11618         |
| <i>D. pseudoobscura</i> | 384           | 17-532             |
|                         | 521           | 5574-4963          |
|                         | 1362          | 13473-13218        |
|                         | 2192          | 3433-4322          |
|                         | 2193          | 3840-4137          |
|                         | 3151          | 21387-23048        |
|                         | 3152          | 9685-8131          |
|                         | 3311          | 5683-4590          |
|                         | 3409          | 5918-6991          |
|                         | 3514          | 4441-3863          |
|                         | 3688          | 28103-29511        |
|                         | 4007          | 55218-55959        |
|                         | 4025          | 782-265            |
|                         | 4842          | 7178-6832          |
|                         | 5255          | 6307-6857          |
|                         | 5529          | 5015-4446          |
|                         | 5668          | 514-1070           |
| <i>D. persimilis</i>    | 2279          | 35952-37131        |
|                         | 2979          | 65246-64154        |
|                         | 7728          | 2360-3504          |
|                         | 7729          | 4139-5587          |
|                         | 7807          | 4183-4785          |

| <b>Species</b>       | <b>Contig</b> | <b>Coordinates</b>                    |
|----------------------|---------------|---------------------------------------|
|                      | 9771          | 76484-77861                           |
|                      | 11866         | 2506-3153                             |
|                      | 12167         | 28-218                                |
|                      | 12803         | 984-2401                              |
|                      | 12806         | 4579-4847                             |
|                      | 13439         | 740-141                               |
|                      | 13644         | 5604-6247                             |
|                      | 14651         | 3800-4468                             |
|                      | 16801         | 936-669                               |
| <i>D. willistoni</i> | 480           | 2760-1949                             |
|                      | 1514          | 1430-255                              |
|                      | 1633          | 1484-3134                             |
|                      | 1765          | 758-1818                              |
|                      | 3103          | 2956-1579                             |
|                      | 3729          | 2677-1005                             |
|                      | 4852          | 3775-2272                             |
|                      | 5955          | 5147-3320                             |
|                      | 5995          | 709-2234                              |
|                      | 6043          | 7043-5519                             |
|                      | 8665          | 22915-21026                           |
|                      | 9276          | 484-1020                              |
|                      | 9858          | 3576-3081                             |
|                      | 10048         | 88633-85942                           |
|                      | 12170         | 994-1320                              |
| 16933                | 1388-1        |                                       |
| <i>D. virilis</i>    | 1717          | 1-1012                                |
|                      | 15993         | 12835-13499, 14137-15635              |
|                      | 15994         | 525-1189, 1833-3328                   |
|                      | 16046         | 32251-30912                           |
|                      | 16409         | 4899-7707                             |
| <i>D. mojavensis</i> | 7794          | 15733-16250, 16996-17354, 17922-19752 |
|                      | 8435          | 2326-4274                             |

| <b>Species</b> | <b>Contig</b> | <b>Coordinates</b>                |
|----------------|---------------|-----------------------------------|
|                | 9930          | 6622-3845, 2943-2925              |
|                | 10367         | 5542-4941                         |
|                | 10369         | 33528-35574                       |
|                | 10376         | 5737-8521                         |
|                | 10758         | 41776-38993                       |
|                | 10765         | 58610-56353, 55103-54923          |
|                | 10770         | 11540-14367                       |
|                | 10773         | 38494-36616, 35773-35425          |
|                | 10792         | 25781-23831                       |
|                | 10918         | 8142-8284, 9122-9799, 10584-12359 |
|                | 10924         | 27530-30351                       |
|                | 10946         | 8917-8941, 9824-12351             |
|                | 11233         | 8461-5654                         |
|                | 11255         | 2735-5284                         |

## B. 1360 sequences

| Species                | Contig          | Coordinates       |
|------------------------|-----------------|-------------------|
| <i>D. melanogaster</i> | Chr 4           | 812470-809907     |
|                        | Chr 2L          | 20145959-20144580 |
|                        | Hoppel-1        | Ref. 25           |
|                        | Hoppel-2        | Ref. 25           |
|                        | Hoppel Delta 5' | Ref. 25           |
| <i>D. simulans</i>     | Chr 2L Random   | 797960-799694     |
|                        | Chr 2L Random   | 802845-804906     |
|                        | Chr 2R          | 1199657-1199795   |
|                        | Chr 2R          | 1200547-1201734   |
|                        | Chr 2R          | 1208090-1206110   |
|                        | Chr 3L          | 18143039-18143892 |
|                        | Chr U           | 8188307-8185783   |
| <i>D. sechellia</i>    | 3536            | 2255-2621         |
|                        | 9279            | 386-2615          |
|                        | 6826            | 2014-40           |
|                        | 11410           | 1640-11           |
|                        | 5259            | 2194-4726         |
|                        | 12180           | 2014-313          |
|                        | 5902            | 5125-2571         |
|                        | 3527            | 1-1564            |
| <i>D. erecta</i>       | 7363            | 803868-801367     |
|                        | 6939            | 4861-5757         |
|                        | 7407            | 140279-137852     |
|                        | 7373            | 87864-86694       |
|                        | 7387            | 150284-149418     |
|                        | 7387            | 135352-137773     |
|                        | 7387            | 108989-106572     |
|                        | 6826            | 4906-5127         |
| <i>D. yakuba</i>       | 260.3           | 23020-20458       |
|                        | 5.41            | 7616-10177        |
|                        | 0.40            | 345812-348373     |

| <b>Species</b>          | <b>Contig</b> | <b>Coordinates</b>       |
|-------------------------|---------------|--------------------------|
|                         | 2.7           | 423893-421332            |
| <i>D. pseudoobscura</i> | 784           | 23339-25777              |
|                         | 1994          | 72290-72758              |
|                         | 4431          | 49805-50291              |
|                         | 520           | 17194-17712              |
| <i>D. persimilis</i>    | 17644         | 428-816                  |
|                         | 9857          | 66929-64479              |
|                         | 11446         | 2544-2069                |
|                         | 11871         | 3502-3042, 1903-1373     |
|                         | 14344         | 495-1631                 |
| <i>D. virilis</i>       | 17532         | 8869-8505                |
|                         | 13070         | 7536-6667                |
|                         | 15641         | 25683-27672, 28440-28823 |
|                         | 17537         | 36198-33865, 33361-33160 |
|                         | 4746          | 3288-4134                |

Coordinates corresponding to the transposase sequence inside each contig are given following the transcriptional direction (from Methionine to STOP codon).
